# Supplementary material for: Thermal treatment-induced structural changes in graphene nanoribbons obtained from partially unzipped double-walled carbon nanotubes
Source: Royal Society of Chemistry journal article supplement (doi:10.1039/c6ra20009e), 2016-01-01
Supplement: c6ra20009e1.pdf [file c6ra20009e1.pdf]

Electronic Supplementary information of

Thermal Treatment-Induced Structural Changes in Graphene Nanoribbons  
Obtained from Partially Unzipped Double-Walled Carbon Nanotubes

Dukeun Kim,<sup>a,b</sup> Hiroyuki Muramatsu,<sup>c</sup> and Yoong Ahm Kim<sup>a,b,\*</sup>

*<sup>a</sup>Alan G. MacDiarmid Energy Research Institute & School of Polymer Science and Engineering, Chonnam National University, Gwangju 500-757, Republic of Korea*

*<sup>b</sup>Department of Polymer Engineering, Graduated School & School of Polymer Science and Engineering, Chonnam National University, 77 Yongbong-ro, Buk-gu, Gwangju, 500-757, Korea.*

*<sup>c</sup> Faculty of Engineering, Shinshu University, Wakasato, 4-17-1, Nagano, 380-8553, Japan.*

*\*Corresponding author: Tel: +82-62-530-1871, Fax: +82-62-530-1920, E-mail: [yak@jnu.ac.kr](mailto:yak@jnu.ac.kr).*

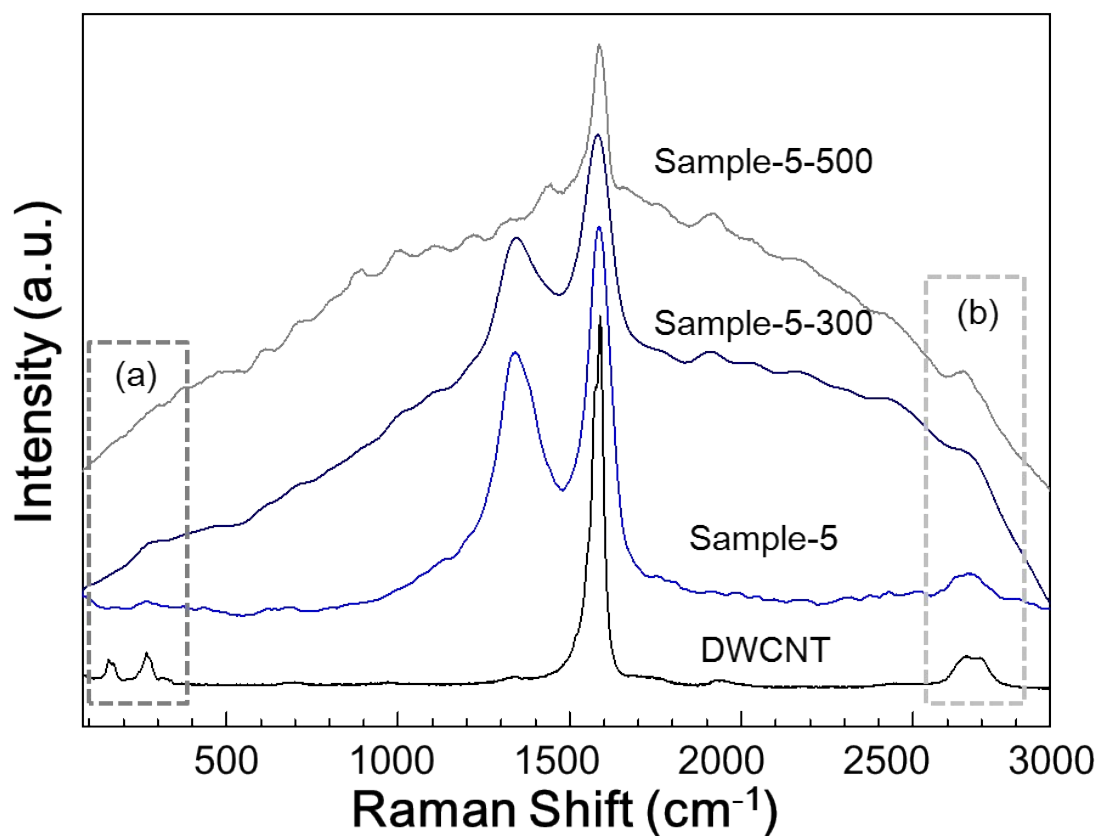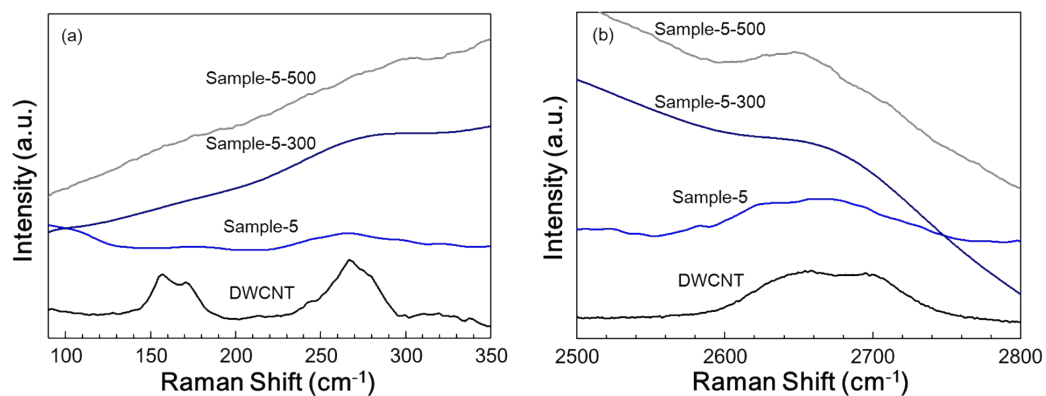

**Fig. S1** Raman spectra of starting DWCNT and chemically treated DWCNTs by 5 times of  $\text{KMnO}_4$  with and without heating treatments at 300°C (Sample-5-300) and 500°C (Sample-5-500), respectively.

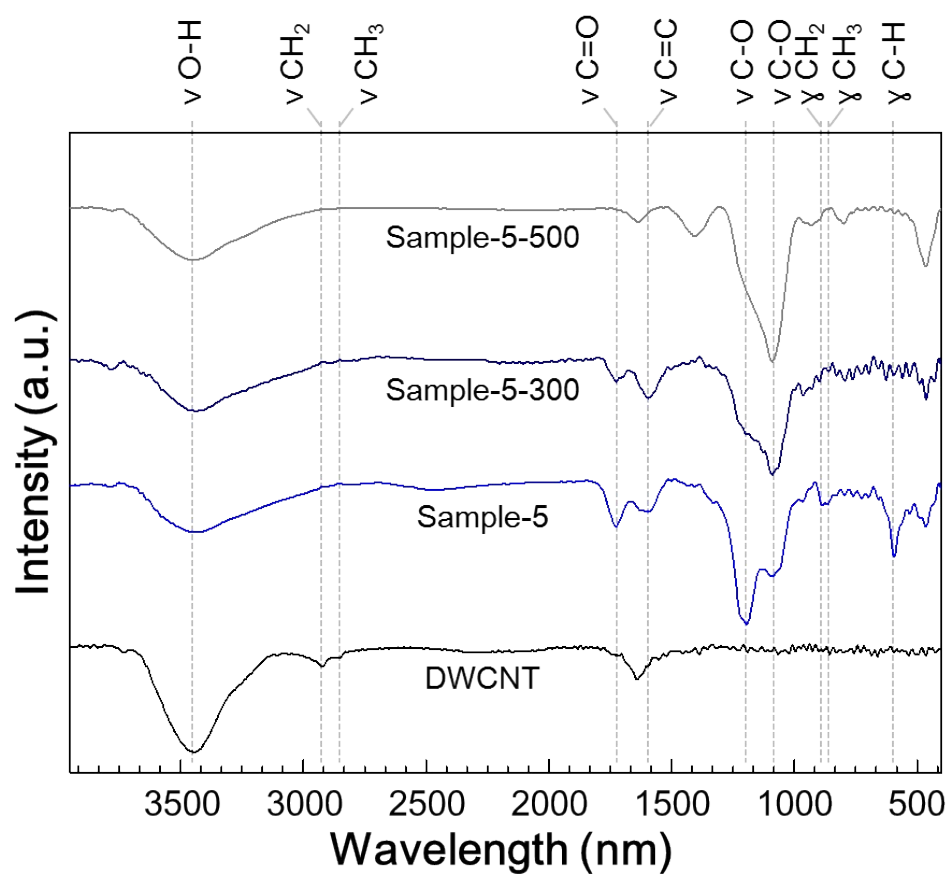

**Fig. S2** FT-IR spectra of starting DWCNTs and chemically treated DWCNTs by 5 times of  $\text{KMnO}_4$  with and without heating treatments at 300°C (Sample-5-300) and 500°C (Sample-5-500), respectively.

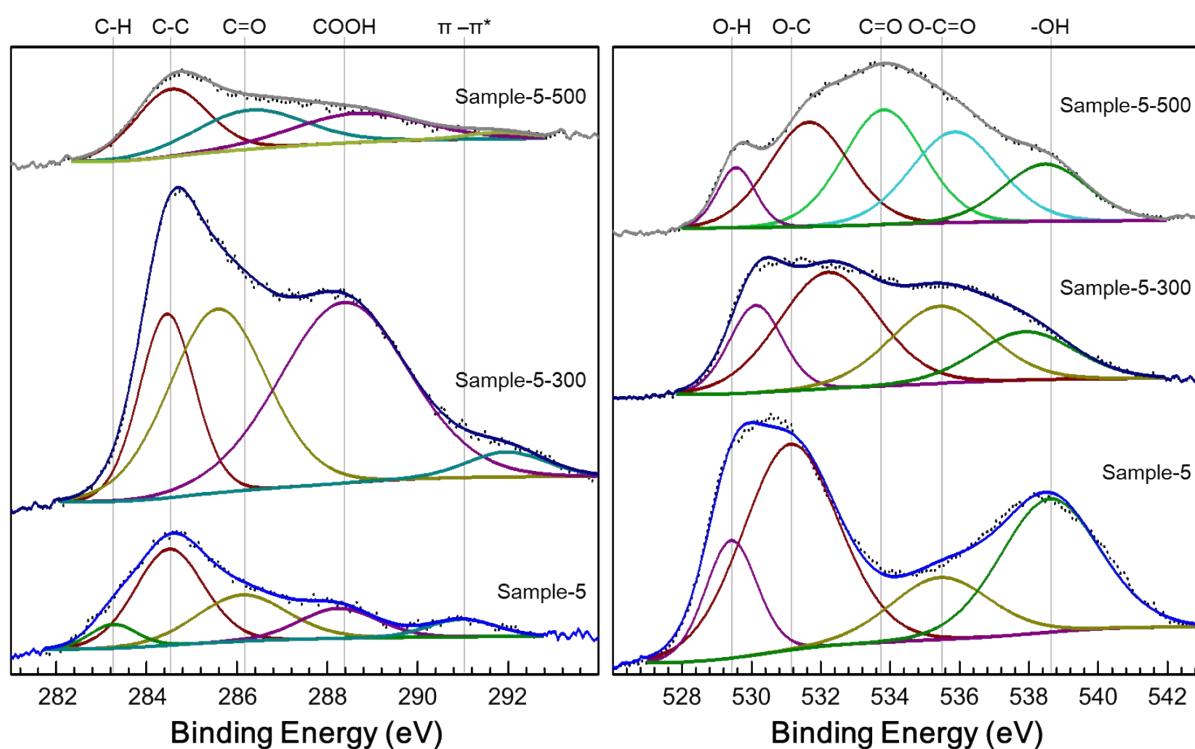

**Fig. S3** C1s and O1s spectra from XPS analysis of chemically treated DWCNTs by 5 times of  $\text{KMnO}_4$  with and without heating treatment at 300°C (Sample-5-300) and 500°C (Sample-5-500), respectively.

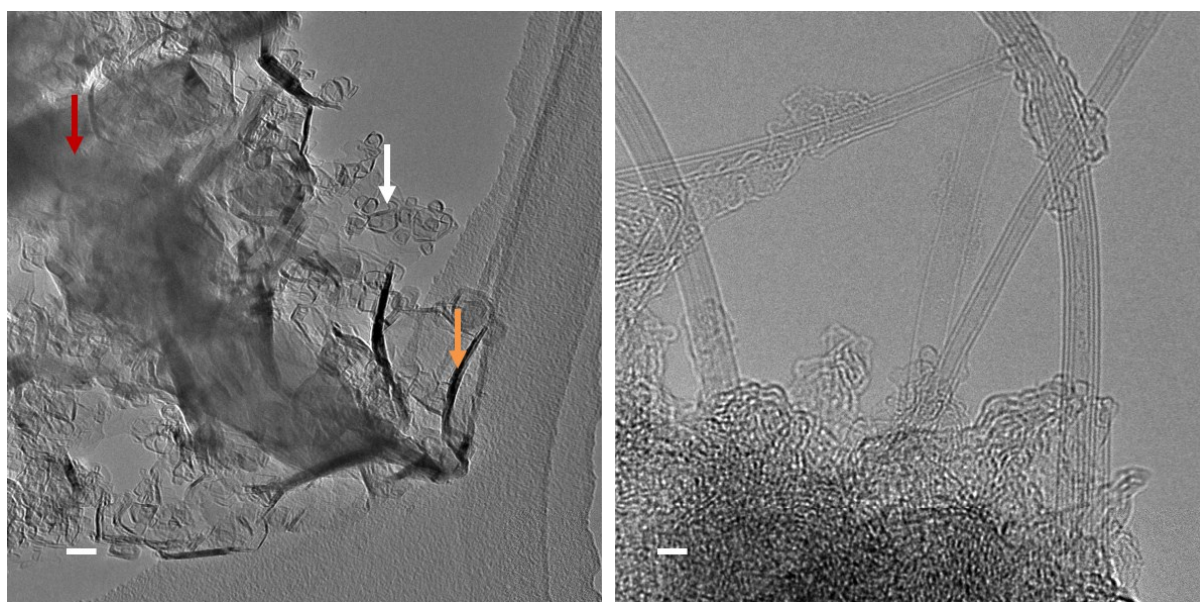

**Fig. S4** HR-TEM images of chemically treated DWCNTs by 5 times of  $\text{KMnO}_4$  heated at  $300^\circ\text{C}$ , scale = 2 nm

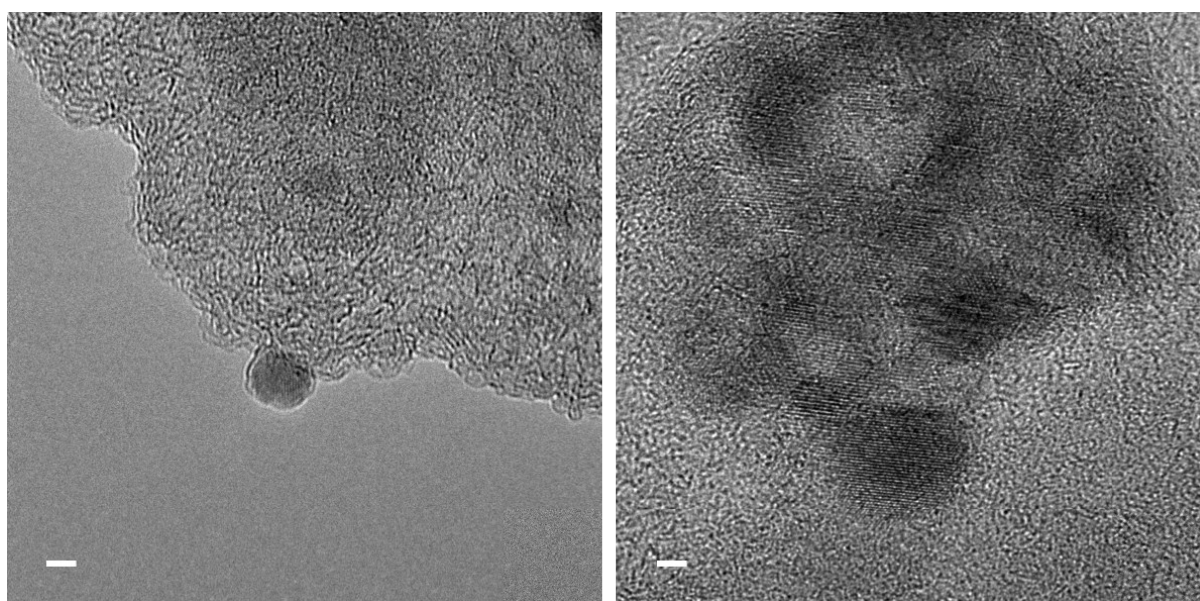

**Fig. S5** HR-TEM images of chemically treated DWCNTs by 5 times of  $\text{KMnO}_4$  heated at  $500^\circ\text{C}$ , scale = 2 nm
